# Supplementary material for: Prediction of oxygen requirement in patients with COVID-19 using a pre-trained chest radiograph xAI model: efficient development of auditable risk prediction models via a fine-tuning approach
Source: PubMed Central journal article supplement (PMC9729627; doi:10.1038/s41598-022-24721-5), 2022-12-07
Supplement: 41598_2022_24721_MOESM1_ESM.pdf [file 41598_2022_24721_MOESM1_ESM.pdf]

| AP view                    | Train set |       |           |      |          |       | Validation set |       |           |      |          |       | Test set |       |          |        |
|----------------------------|-----------|-------|-----------|------|----------|-------|----------------|-------|-----------|------|----------|-------|----------|-------|----------|--------|
|                            | Positive  |       | Uncertain |      | Negative |       | Positive       |       | Uncertain |      | Negative |       | Positive |       | Negative |        |
| Fracture                   | 3,446     | 4.8%  | 521       | 0.7% | 68,171   | 94.5% | 576            | 4.1%  | 89        | 0.6% | 13,364   | 95.3% | 12       | 1.2%  | 988      | 98.8%  |
| Non-fracture               | 1,275     | 1.8%  | 26        | 0.0% | 70,837   | 98.2% | 177            | 1.3%  | 6         | 0.0% | 13,846   | 98.7% | 5        | 0.5%  | 995      | 99.5%  |
| Diaphragm                  | 3,293     | 4.6%  | 116       | 0.2% | 68,729   | 95.3% | 580            | 4.1%  | 30        | 0.2% | 13,419   | 95.7% | 8        | 0.8%  | 992      | 99.2%  |
| Foreign body               | 44,034    | 61.0% | 2,487     | 3.4% | 25,617   | 35.5% | 9,866          | 70.3% | 440       | 3.1% | 3,723    | 26.5% | 677      | 67.7% | 323      | 32.3%  |
| Aorta                      | 4,638     | 6.4%  | 351       | 0.5% | 67,149   | 93.1% | 716            | 5.1%  | 51        | 0.4% | 13,262   | 94.5% | 63       | 6.3%  | 937      | 93.7%  |
| Cardiomegaly               | 10,583    | 14.7% | 1,904     | 2.6% | 59,651   | 82.7% | 2,171          | 15.5% | 407       | 2.9% | 11,451   | 81.6% | 227      | 22.7% | 773      | 77.3%  |
| Hilar area                 | 266       | 0.4%  | 205       | 0.3% | 71,667   | 99.3% | 39             | 0.3%  | 29        | 0.2% | 13,961   | 99.5% | 2        | 0.2%  | 998      | 99.8%  |
| Mediastinum                | 1,423     | 2.0%  | 449       | 0.6% | 70,266   | 97.4% | 255            | 1.8%  | 88        | 0.6% | 13,686   | 97.6% | 16       | 1.6%  | 984      | 98.4%  |
| Cavity/Cyst                | 325       | 0.5%  | 110       | 0.2% | 71,703   | 99.4% | 116            | 0.8%  | 18        | 0.1% | 13,895   | 99.0% | 6        | 0.6%  | 994      | 99.4%  |
| Emphysema                  | 982       | 1.4%  | 2,261     | 3.1% | 68,895   | 95.5% | 170            | 1.2%  | 480       | 3.4% | 13,379   | 95.4% | 2        | 0.2%  | 998      | 99.8%  |
| Atelectasis                | 36,785    | 51.0% | 407       | 0.6% | 34,946   | 48.4% | 7,734          | 55.1% | 126       | 0.9% | 6,169    | 44.0% | 554      | 55.4% | 446      | 44.6%  |
| Nodule/mass                | 3,663     | 5.1%  | 388       | 0.5% | 68,087   | 94.4% | 575            | 4.1%  | 49        | 0.3% | 13,405   | 95.6% | 18       | 1.8%  | 982      | 98.2%  |
| Other interstitial opacity | 2,334     | 3.2%  | 102       | 0.1% | 69,702   | 96.6% | 452            | 3.2%  | 20        | 0.1% | 13,557   | 96.6% | 8        | 0.8%  | 992      | 99.2%  |
| Pulmonary edema            | 18,620    | 25.8% | 2,921     | 4.0% | 50,597   | 70.1% | 4,568          | 32.6% | 504       | 3.6% | 8,957    | 63.8% | 276      | 27.6% | 724      | 72.4%  |
| Pneumonia                  | 19,581    | 27.1% | 3,209     | 4.4% | 49,348   | 68.4% | 4,322          | 30.8% | 579       | 4.1% | 9,128    | 65.1% | 174      | 17.4% | 826      | 82.6%  |
| Decreased lung volume      | 17,539    | 24.3% | 879       | 1.2% | 53,720   | 74.5% | 3,352          | 23.9% | 187       | 1.3% | 10,490   | 74.8% | 174      | 17.4% | 826      | 82.6%  |
| Increased lung volume      | 820       | 1.1%  | 16        | 0.0% | 71,302   | 98.8% | 158            | 1.1%  | 4         | 0.0% | 13,867   | 98.8% | 0        | 0.0%  | 1,000    | 100.0% |
| Other pleural lesions      | 1,678     | 2.3%  | 1,942     | 2.7% | 68,518   | 95.0% | 329            | 2.3%  | 348       | 2.5% | 13,352   | 95.2% | 4        | 0.4%  | 996      | 99.6%  |
| Pleural effusion           | 23,020    | 31.9% | 263       | 0.4% | 48,855   | 67.7% | 5,759          | 41.1% | 51        | 0.4% | 8,219    | 58.6% | 348      | 34.8% | 652      | 65.2%  |
| Pneumothorax               | 5,485     | 7.6%  | 1,612     | 2.2% | 65,041   | 90.2% | 1,361          | 9.7%  | 351       | 2.5% | 12,317   | 87.8% | 71       | 7.1%  | 929      | 92.9%  |

| PA view                    | Train set |       |           |      |          |       | Validation set |       |           |      |          |       | Test set |       |          |       |
|----------------------------|-----------|-------|-----------|------|----------|-------|----------------|-------|-----------|------|----------|-------|----------|-------|----------|-------|
|                            | Positive  |       | Uncertain |      | Negative |       | Positive       |       | Uncertain |      | Negative |       | Positive |       | Negative |       |
| Fracture                   | 1,919     | 2.9%  | 474       | 0.7% | 64,155   | 96.4% | 372            | 3.0%  | 97        | 0.8% | 11,785   | 96.2% | 31       | 3.1%  | 969      | 96.9% |
| Non-fracture               | 2,787     | 4.2%  | 25        | 0.0% | 63,736   | 95.8% | 524            | 4.3%  | 7         | 0.1% | 11,723   | 95.7% | 10       | 1.0%  | 990      | 99.0% |
| Diaphragm                  | 2,171     | 3.3%  | 132       | 0.2% | 64,245   | 96.5% | 393            | 3.2%  | 19        | 0.2% | 11,842   | 96.6% | 15       | 1.5%  | 985      | 98.5% |
| Foreign body               | 16,011    | 24.1% | 1,189     | 1.8% | 49,348   | 74.2% | 3,208          | 26.2% | 191       | 1.6% | 8,855    | 72.3% | 244      | 24.4% | 756      | 75.6% |
| Aorta                      | 3,272     | 4.9%  | 403       | 0.6% | 62,873   | 94.5% | 609            | 5.0%  | 85        | 0.7% | 11,560   | 94.3% | 167      | 16.7% | 833      | 83.3% |
| Cardiomegaly               | 4,289     | 6.4%  | 1,001     | 1.5% | 61,258   | 92.1% | 805            | 6.6%  | 170       | 1.4% | 11,279   | 92.0% | 104      | 10.4% | 896      | 89.6% |
| Hilar area                 | 197       | 0.3%  | 97        | 0.1% | 66,254   | 99.6% | 37             | 0.3%  | 18        | 0.1% | 12,199   | 99.6% | 11       | 1.1%  | 989      | 98.9% |
| Mediastinum                | 794       | 1.2%  | 388       | 0.6% | 65,366   | 98.2% | 121            | 1.0%  | 87        | 0.7% | 12,046   | 98.3% | 8        | 0.8%  | 992      | 99.2% |
| Cavity/Cyst                | 221       | 0.3%  | 78        | 0.1% | 66,249   | 99.6% | 38             | 0.3%  | 19        | 0.2% | 12,197   | 99.5% | 3        | 0.3%  | 997      | 99.7% |
| Emphysema                  | 830       | 1.2%  | 337       | 0.5% | 65,381   | 98.2% | 159            | 1.3%  | 61        | 0.5% | 12,034   | 98.2% | 2        | 0.2%  | 998      | 99.8% |
| Atelectasis                | 12,905    | 19.4% | 245       | 0.4% | 53,398   | 80.2% | 2,539          | 20.7% | 40        | 0.3% | 9,675    | 79.0% | 235      | 23.5% | 765      | 76.5% |
| Nodule/mass                | 3,981     | 6.0%  | 503       | 0.8% | 62,064   | 93.3% | 733            | 6.0%  | 92        | 0.8% | 11,429   | 93.3% | 36       | 3.6%  | 964      | 96.4% |
| Other interstitial opacity | 4,047     | 6.1%  | 209       | 0.3% | 62,292   | 93.6% | 780            | 6.4%  | 37        | 0.3% | 11,437   | 93.3% | 12       | 1.2%  | 988      | 98.8% |
| Pulmonary edema            | 2,417     | 3.6%  | 4,121     | 6.2% | 60,010   | 90.2% | 492            | 4.0%  | 783       | 6.4% | 10,979   | 89.6% | 35       | 3.5%  | 965      | 96.5% |
| Pneumonia                  | 8,602     | 12.9% | 4,836     | 7.3% | 53,110   | 79.8% | 1,663          | 13.6% | 939       | 7.7% | 9,652    | 78.8% | 123      | 12.3% | 877      | 87.7% |
| Decreased lung volume      | 4,530     | 6.8%  | 274       | 0.4% | 61,744   | 92.8% | 833            | 6.8%  | 50        | 0.4% | 11,371   | 92.8% | 23       | 2.3%  | 977      | 97.7% |
| Increased lung volume      | 2,290     | 3.4%  | 13        | 0.0% | 64,245   | 96.5% | 422            | 3.4%  | 4         | 0.0% | 11,828   | 96.5% | 8        | 0.8%  | 992      | 99.2% |
| Other pleural lesions      | 1,659     | 2.5%  | 1,372     | 2.1% | 63,517   | 95.4% | 370            | 3.0%  | 261       | 2.1% | 11,623   | 94.9% | 8        | 0.8%  | 992      | 99.2% |
| Pleural effusion           | 7,044     | 10.6% | 299       | 0.4% | 59,205   | 89.0% | 1,512          | 12.3% | 57        | 0.5% | 10,685   | 87.2% | 136      | 13.6% | 864      | 86.4% |
| Pneumothorax               | 885       | 1.3%  | 388       | 0.6% | 65,275   | 98.1% | 155            | 1.3%  | 68        | 0.6% | 12,031   | 98.2% | 9        | 0.9%  | 991      | 99.1% |

**Supplementary Table 1. Summary statistics for train, validation, and test sets. Number of images with percentages are reported, unless otherwise specified. *Reproduced from Kim (2022)*<sup>6</sup>.**

| Label                      | Accuracy (%) | Precision (%) | Recall (%) | F1 (%) |
|----------------------------|--------------|---------------|------------|--------|
| Fracture                   | 100.0        | 100.0         | 100.0      | 100.0  |
| Non-fracture               | 100.0        | 100.0         | 100.0      | 100.0  |
| Diaphragm                  | 100.0        | 100.0         | 100.0      | 100.0  |
| Foreign body               | 100.0        | 100.0         | 100.0      | 100.0  |
| Aorta                      | 100.0        | 100.0         | 100.0      | 100.0  |
| Cardiomegaly               | 100.0        | 100.0         | 100.0      | 100.0  |
| Hilar area                 | 100.0        | 100.0         | 100.0      | 100.0  |
| Mediastinum                | 100.0        | N/A           | N/A        | N/A    |
| Cavity/Cyst                | 100.0        | N/A           | N/A        | N/A    |
| Emphysema                  | 100.0        | N/A           | N/A        | N/A    |
| Atelectasis                | 100.0        | 100.0         | 100.0      | 100.0  |
| Nodule/mass                | 99.1         | 50.0          | 100.0      | 66.7   |
| Other interstitial opacity | 100.0        | 100.0         | 100.0      | 100.0  |
| Pulmonary edema            | 99.1         | 94.7          | 100.0      | 97.3   |
| Pneumonia                  | 100.0        | 100.0         | 100.0      | 100.0  |
| Decreased lung volume      | 100.0        | 100.0         | 100.0      | 100.0  |
| Increased lung volume      | 100.0        | 100.0         | 100.0      | 100.0  |
| Other pleural lesions      | 100.0        | 100.0         | 100.0      | 100.0  |
| Pleural effusion           | 100.0        | 100.0         | 100.0      | 100.0  |
| Pneumothorax               | 100.0        | 100.0         | 100.0      | 100.0  |

**Supplementary Table 2. Performance of the automated labeller on the report evaluation set for mention extraction, negation detection, and uncertainty detection tasks.**

| COVID19 dataset        |           | P-value<br>(MGH training vs test) | MGH (training set)<br>N=1,375 | MGH (test set)<br>N=365 |
|------------------------|-----------|-----------------------------------|-------------------------------|-------------------------|
| Sex                    | M         | 0.086                             | 699 (50.8%)                   | 204 (55.9%)             |
|                        | F         |                                   | 676 (49.2%)                   | 161 (44.1%)             |
| Age                    | Mean, y   | 0.145                             | 58.956±19.399                 | 60.614 ± 19.094         |
| Initial O <sub>2</sub> | RA        | 0.805                             | 894 (65.0%)                   | 243 (66.6%)             |
|                        | LFO       |                                   | 397 (28.9%)                   | 99 (27.1%)              |
|                        | HFO       |                                   | 84 (6.1%)                     | 23 (6.3%)               |
|                        | MV        |                                   | 0 (0%)                        | 0 (0.0%)                |
| Outcome                | Admission | 0.511                             | 955 (69.5%)                   | 260 (71.2%)             |
|                        | Mortality | 0.421                             | 140 (10.2%)                   | 32 (8.8%)               |
| O <sub>2</sub> 24hr    | RA        | 0.229                             | 745 (54.2%)                   | 192 (52.6%)             |
|                        | LFO       |                                   | 469 (34.1%)                   | 141 (38.6%)             |
|                        | HFO       |                                   | 67 (4.9%)                     | 15 (4.1%)               |
|                        | MV        |                                   | 94 (6.8%)                     | 17 (4.7%)               |
| O <sub>2</sub> 72hr    | RA        | 0.095                             | 660 (48.0%)                   | 166 (45.5%)             |
|                        | LFO       |                                   | 468 (34.0%)                   | 147 (40.3%)             |
|                        | HFO       |                                   | 109 (7.9%)                    | 20 (5.5%)               |
|                        | MV        |                                   | 138 (10.0%)                   | 32 (8.8%)               |

**Supplementary Table 3. Demographic and clinical characteristics of patients with COVID-19.** Number of patients with percentages in parentheses and P-values from comparison of the training set and test set are reported. *RA=room air, LFO=low flow oxygen, HFO=high flow oxygen, MV=mechanical ventilation.*

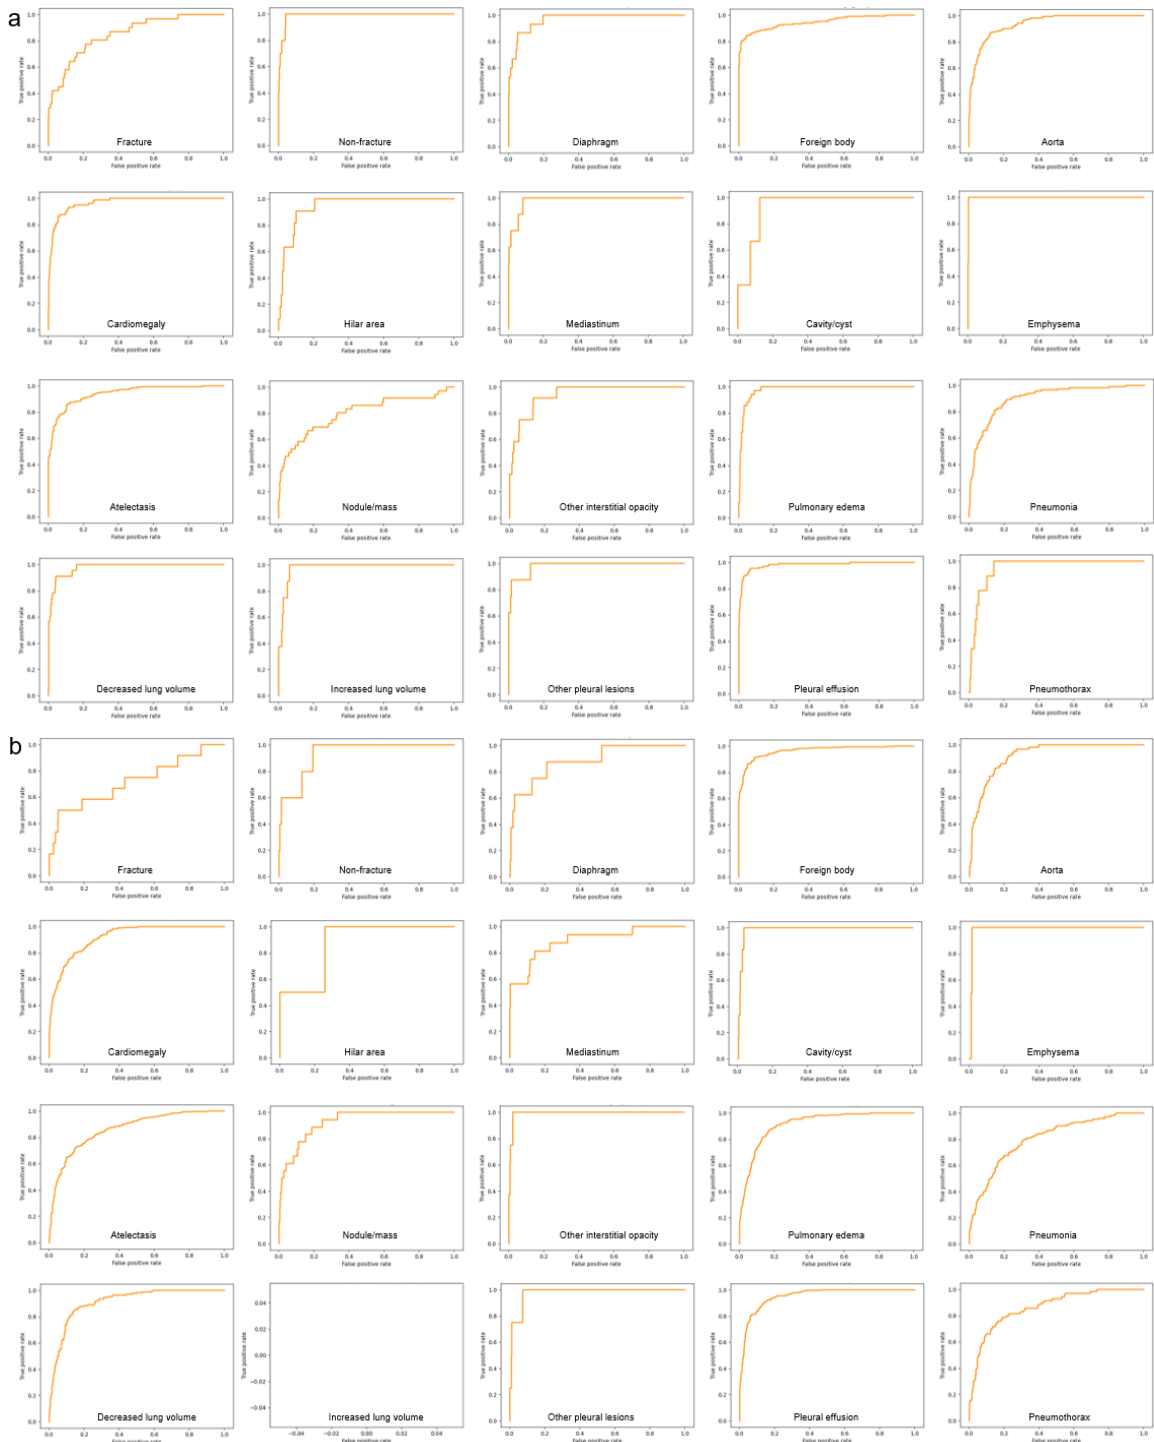

**Supplementary Figure 1. ROCs for PA view (a) and AP view (b), derived from application of the final model to the test set.** Non-fracture refers to non-fracture bone abnormality. Diaphragm, Aorta, Hilar area, and Mediastinum refer to diaphragmatic abnormality, aortic abnormality, hilar abnormality and mediastinal abnormality, respectively. As there were no cases with increased lung volume in the test set, AUROC for this label could not be calculated.

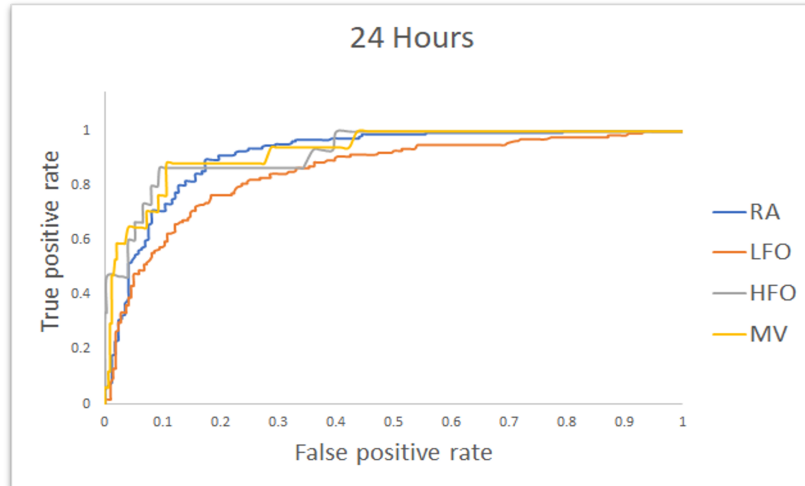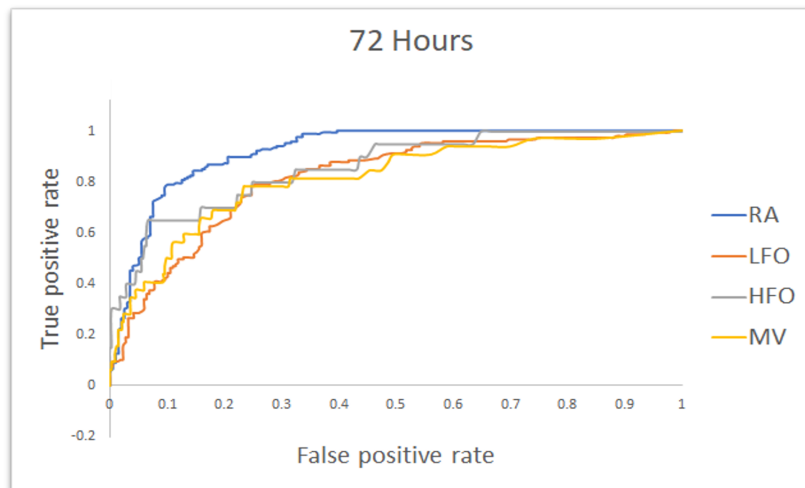

**Supplementary Figure 2. ROCs for prediction of oxygen requirement at 24 and 72 hours from the time of ED admission in patients with COVID-19 infection using infection-associated radiographic features in combination with clinical information. RA=room air, LFO=low flow oxygen, HFO=high flow oxygen, and MV=mechanical ventilation.**

The relative importance of factors predicting the outcome after 24hr

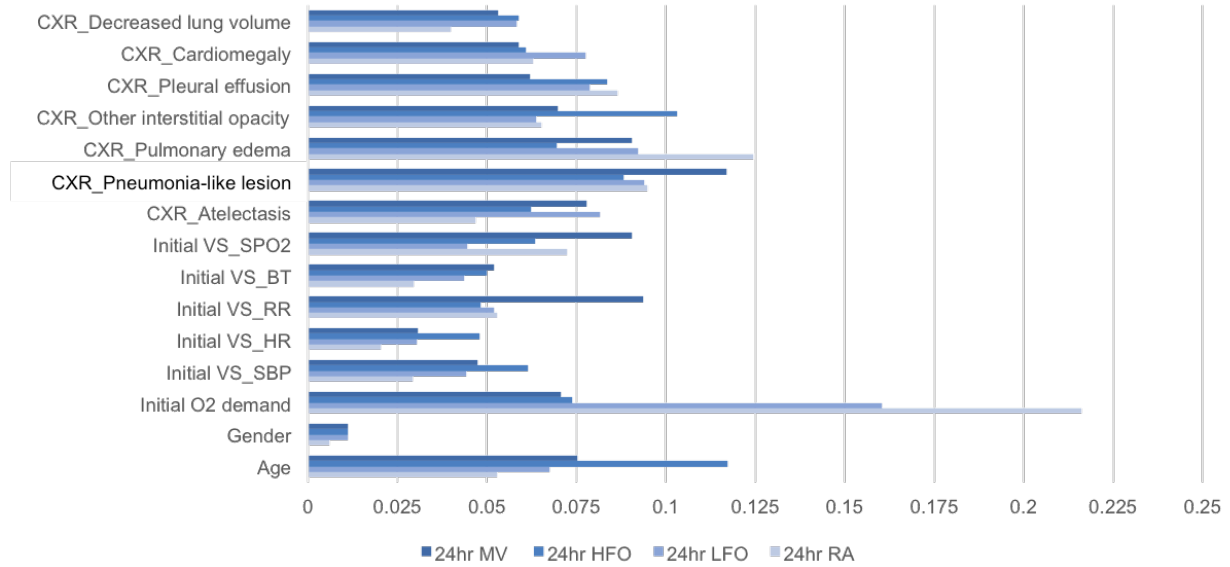

The relative importance of factors predicting the outcome after 72hr

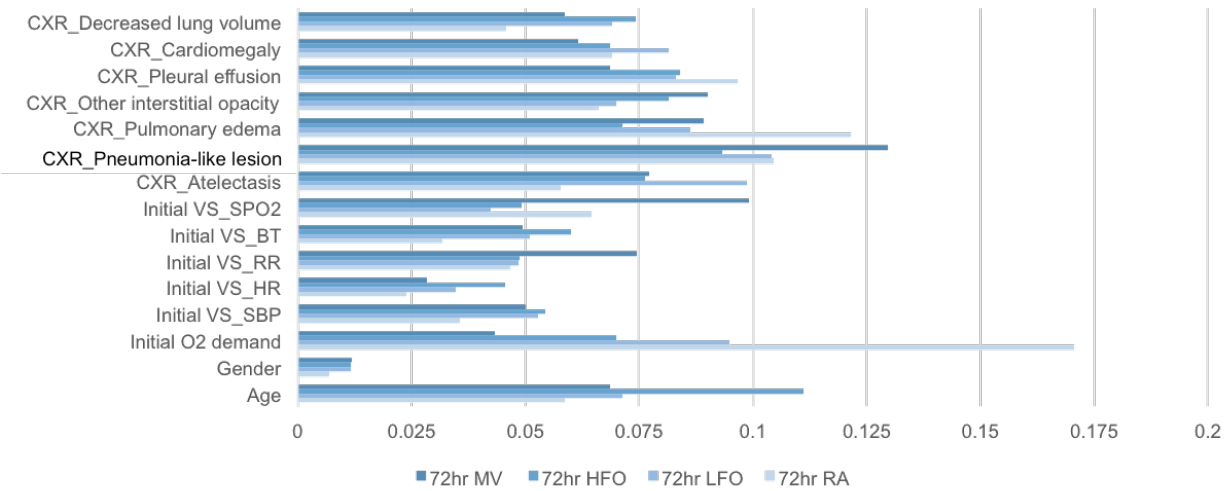

**Supplementary Figure 3. Determinants of oxygen requirement at 24 and 72 hours from the time of ED admission in patients with COVID-19 infection.**

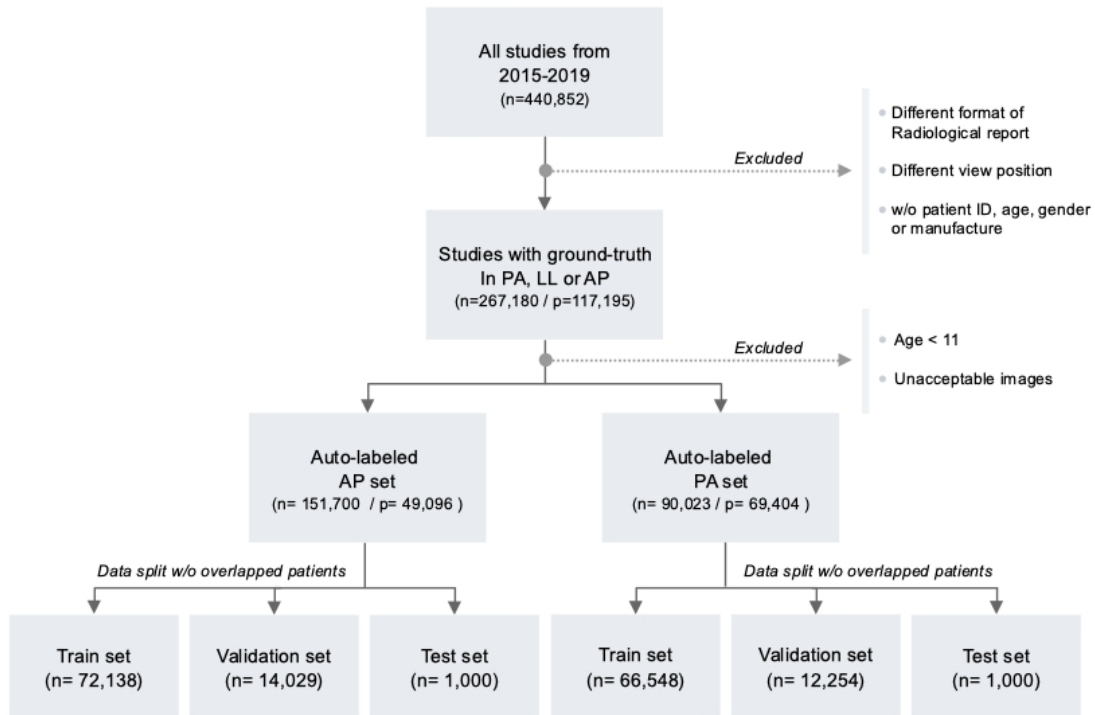

**Supplementary Figure 4. Flowchart of dataset acquisition for xAI model development.** AP and PA views were collected and mapped one-on-one to the annotations extracted by our NLP tool from the corresponding radiology reports. The AP and PA datasets were then divided into train, validation, and test sets without patient overlap. *Reproduced from Kim (2022)*<sup>6</sup>.

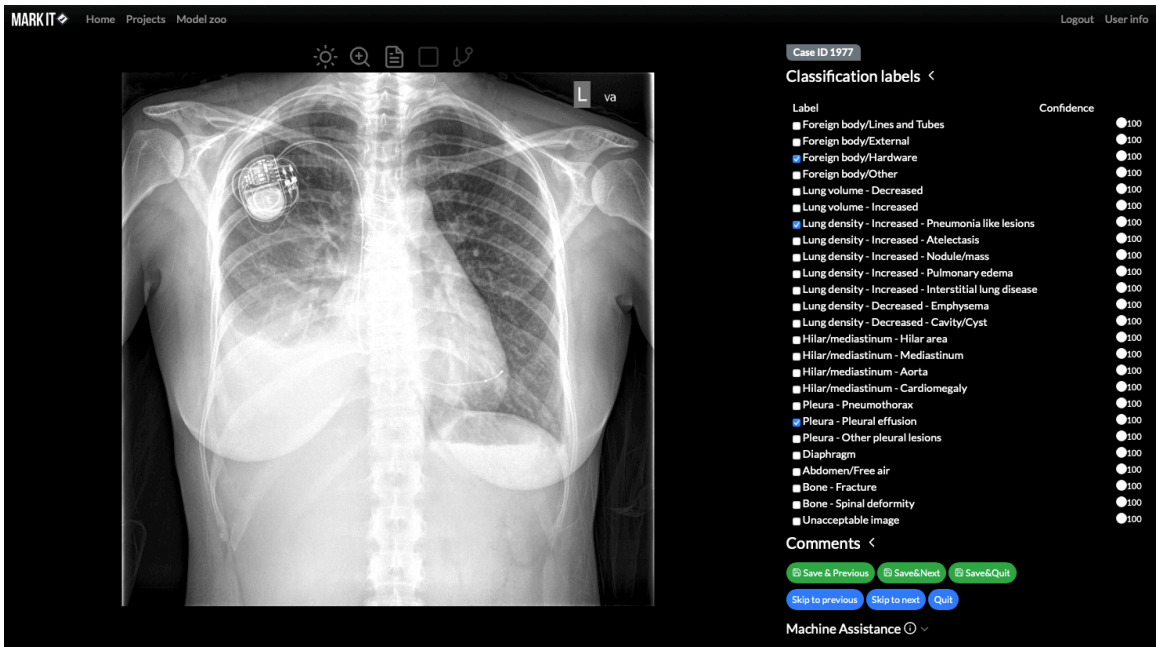

**Supplementary Figure 5. A web-based annotation tool, Markit** (<https://markit.mgh.harvard.edu>, MA, USA).



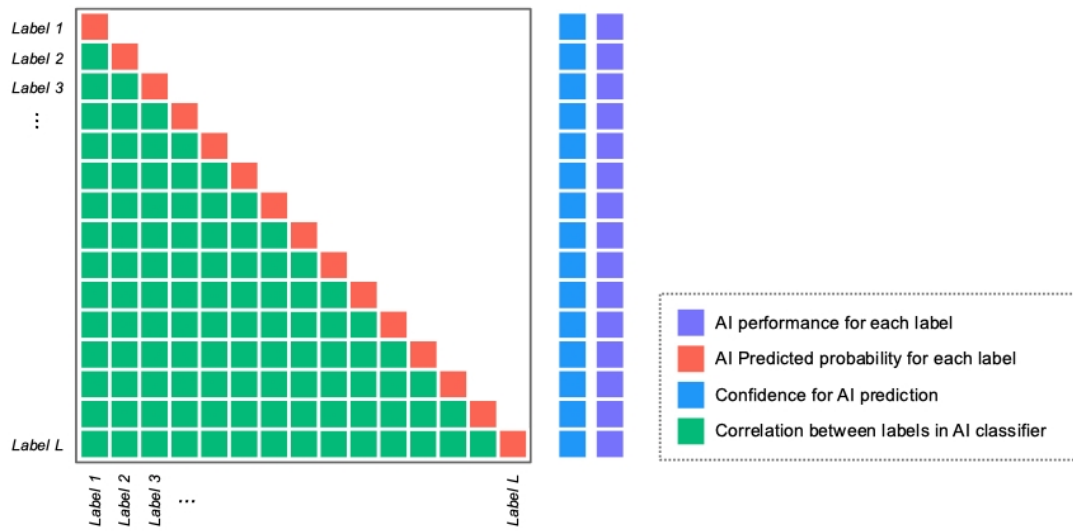

**Supplementary Figure 6. AI scoreboard.** The AI scoreboard is a diagram displaying quantitative metrics, such as prediction probabilities, calibrated classifier confidence, and correlation between labels.
